# Supplementary material for: Engineered Reporter Phages for Rapid Bioluminescence-Based Detection and Differentiation of Viable Listeria Cells
Source: PubMed Central journal article supplement (PMC7237785; doi:10.1128/aem.00442-20), 2020-05-19
Supplement: AEM.00442-20-s0001.pdf [file AEM.00442-20-s0001.pdf]

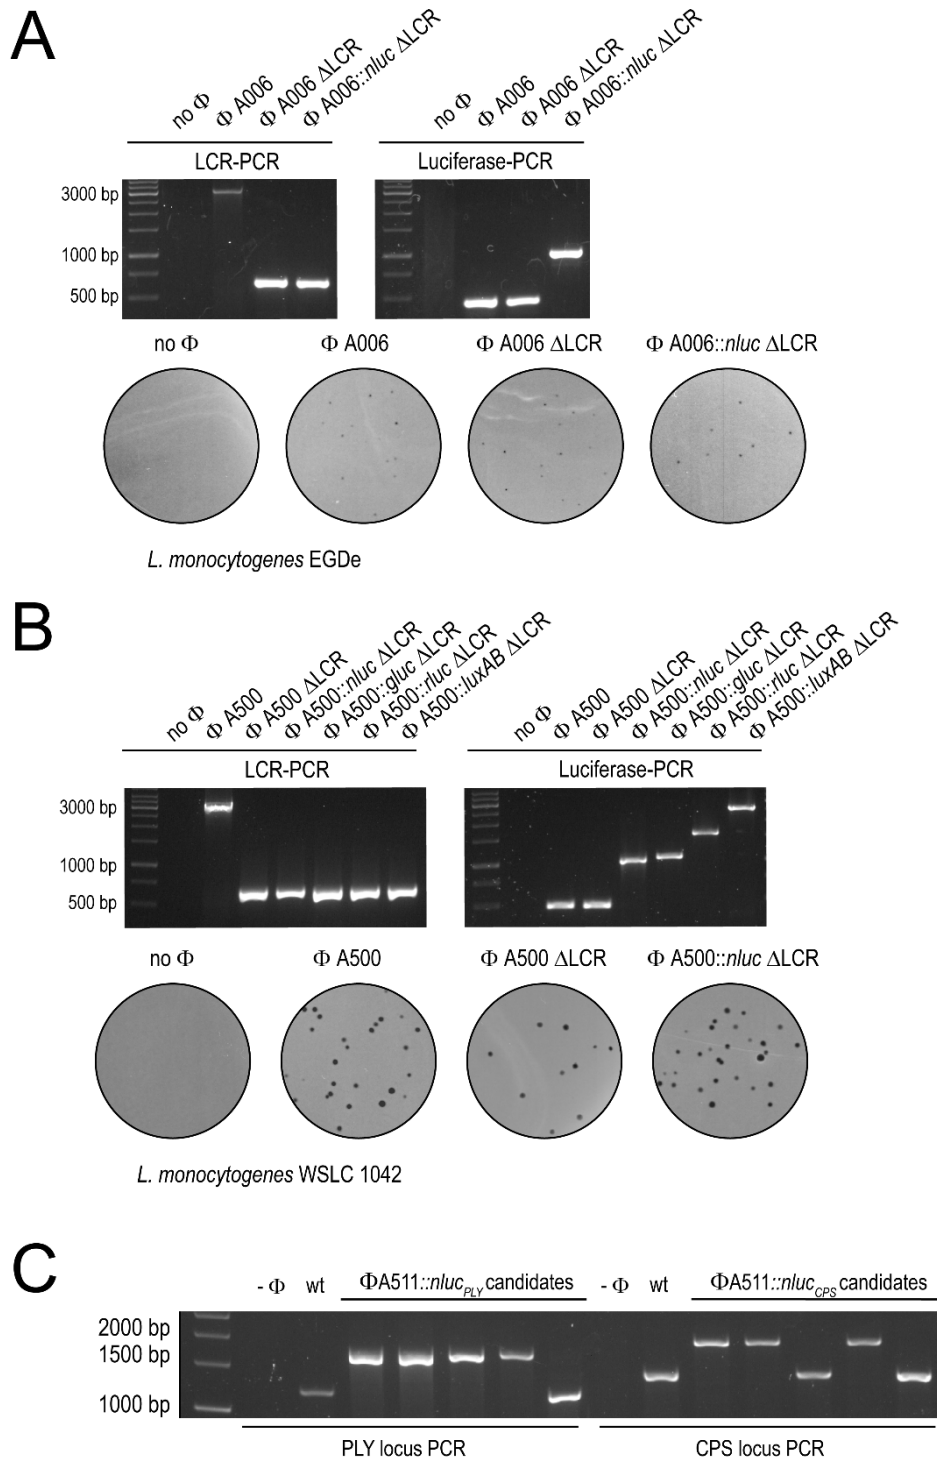

12 **Supplementary Figure S1: Genotypic and phenotypic analysis of engineered phages used in this**  
 13 **study.** PCR verification and plaque morphologies of A006-derived phages (**A**) and A500-derived phages  
 14 (**B**) are shown. Deletions of the lysogeny control regions (LCR-PCR) and correct insertion of luciferase  
 15 sequences (Luciferase-PCR) were verified by PCR and plaque morphologies visualized from soft-agar  
 16 overlays after 24 h of incubation. (**C**) Upon CRISPR-Cas-mediated counterselection, five individual  
 17 plaques were picked and insertion of the heterologous *nluc* gene sequence into the *ply*- or *cps*-locus of  
 18 A511-derived candidates was verified by PCR (“PLY locus PCR” and “CPS locus PCR”, respectively).  
 19 Primers are listed in Table S1.

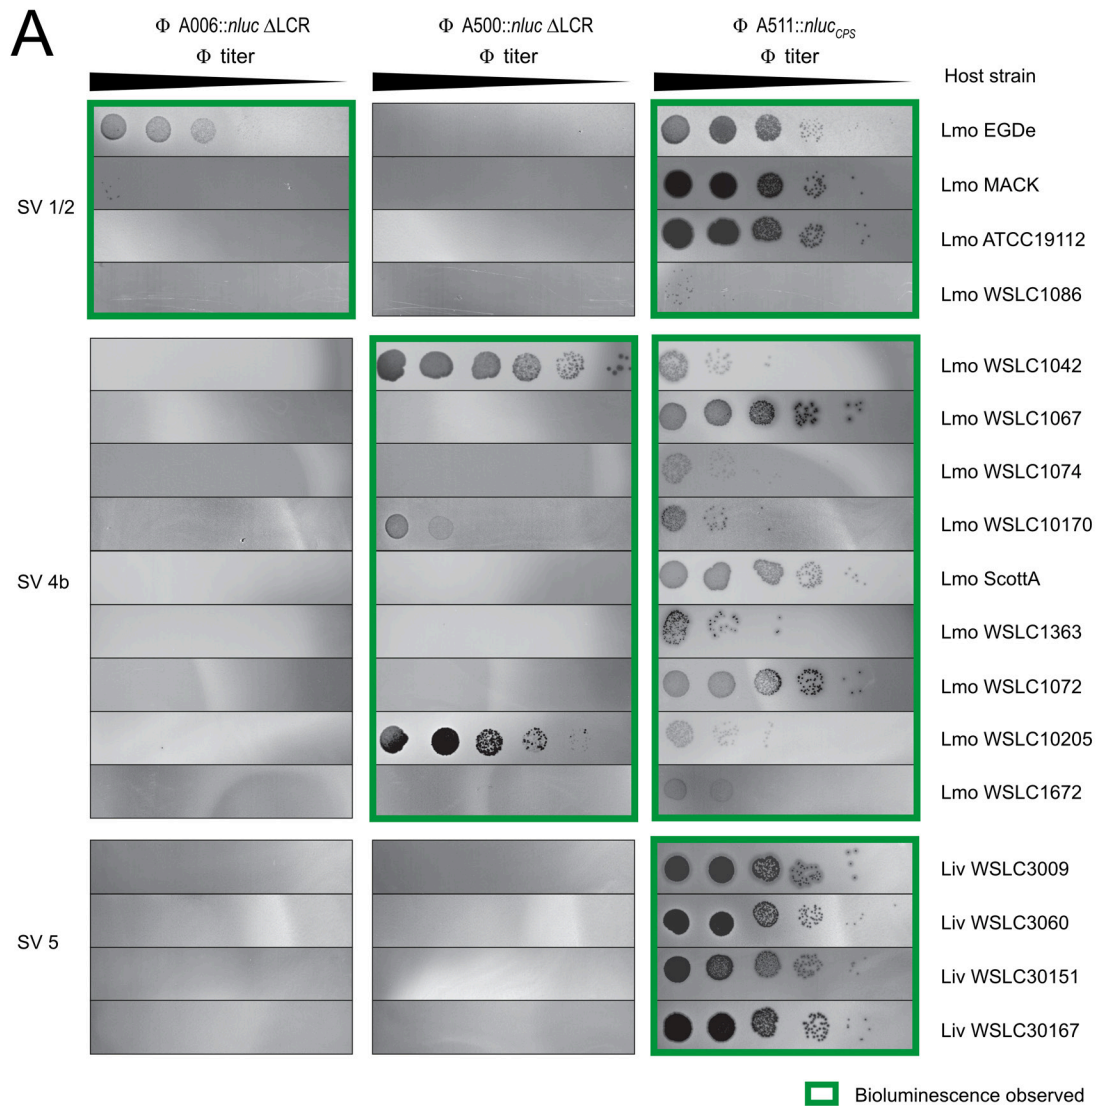

20 **Supplementary Figure S2: Phagotyping and SV differentiation of *Listeria* spp. by**  
 21 **bioluminescence measurements and spot-on-the-lawn plaque assays. (A)** Indicated strains  
 22 covering *Listeria* SVs 1/2, 4b, and 5 were infected with serial dilutions of the indicated phage using spot-  
 23 on-the-lawn assays and plaque formation was visualized 24 h p.i. Host strains that produced a positive  
 24 signal with the indicated phages in the bioluminescence assays are highlighted within green boxes.  
 25

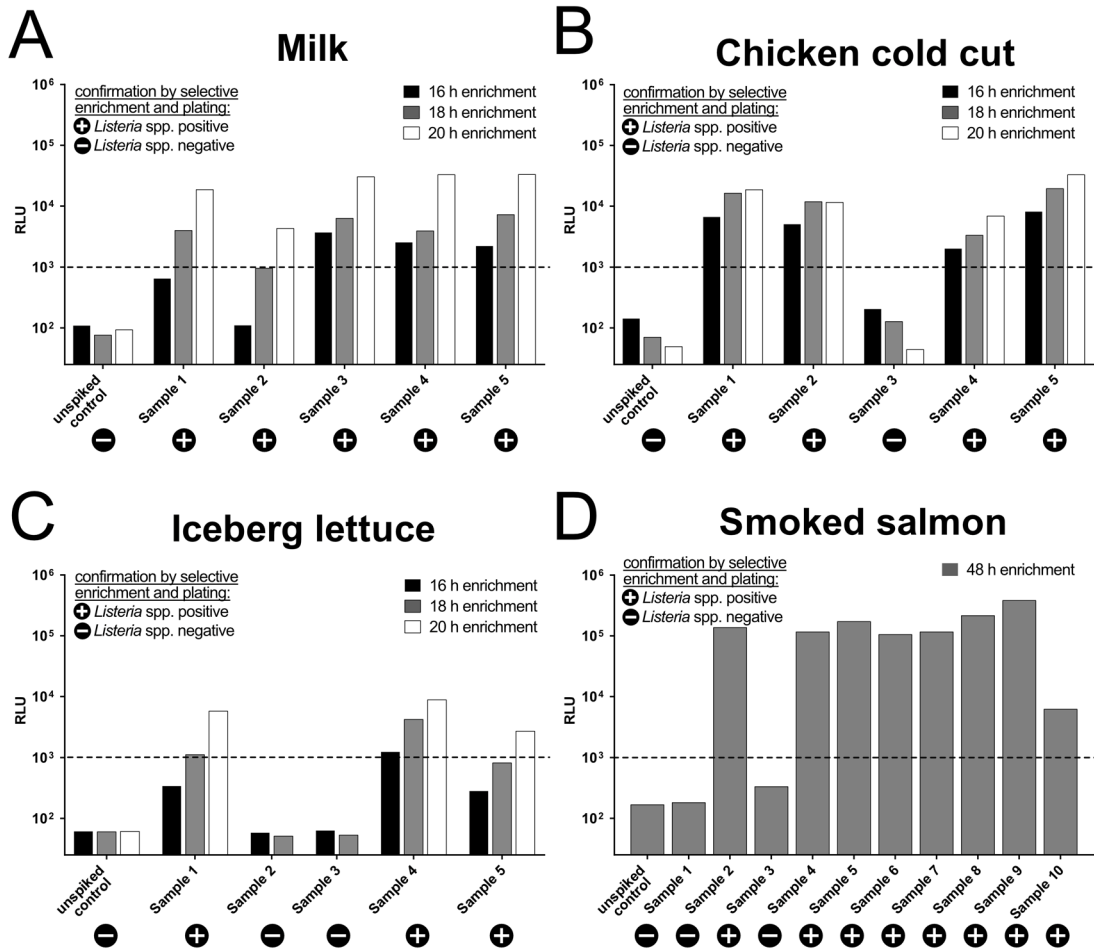

26

27 **Supplementary Figure S3: Bioluminescence-based detection of *Listeria* in artificially**  
 28 **contaminated foods.** Bioluminescence (RLU) of artificially spiked milk (A), chicken cold cut (B), and  
 29 iceberg lettuce (C) are shown after selective enrichment in full LEB (16, 18, and 20 h) and compared to  
 30 results from culture-based detection of the same samples. Spiked salmon samples (D) were enriched  
 31 for 48 h in 1/4 LEB. For each food matrix, one unspiked control was included. (+) culture positive for  
 32 *Listeria*; (-) culture negative for *Listeria*. Samples were contaminated with  $\pm 1$  CFU / 25 g of food  
 33 (quantified values:  $1.4 \pm 0.3$  in milk,  $1.1 \pm 0.1$  in chicken cold cut,  $1.4 \pm 0.1$  in iceberg lettuce and  $1.0 \pm$   
 34  $0.2$  in smoked salmon, errors are STDEV of technical triplicates). Dotted lines = threshold for positive  
 35 samples.

36 **Supplementary Table S1. *Listeria* detection in potentially contaminated food samples from**  
 37 **commercial sources.** Exclusion = experimental clarification of unclear selective plating results; - = no  
 38 growth or negative results; + = growth or positive results; +/- = some growth, untypical morphology; C.  
 39 *citreum* = *Curtobacterium citreum*.

| Food sample<br>(anonym. vendor)      | 3M<br>MDS | Selective plating |          | Reporter phage |                  | Exclusion                             | API test<br>API® <i>Listeria</i> |
|--------------------------------------|-----------|-------------------|----------|----------------|------------------|---------------------------------------|----------------------------------|
|                                      |           | Oxford            | ALOA     | Result         | FC-value         |                                       |                                  |
| Pineapple pieces                     | -         | -                 | -        | -              | 1.42             | nA                                    |                                  |
| Salad with beans and pomegranate     | -         | -                 | -        | -              | 2.15             | nA                                    |                                  |
| Alfa-alfa sprouts                    | -         | -                 | -        | -              | 1.20             | nA                                    |                                  |
| Cheese "Mostkäse"                    | -         | -                 | -        | -              | 1.80             | nA                                    |                                  |
| Salad with carrots, shaker           | -         | -                 | -        | -              | 1.50             | nA                                    |                                  |
| Salad, organic                       | -         | -                 | -        | -              | 0.05             | nA                                    |                                  |
| Spicy thai basil                     | -         | -                 | -        | -              | 1.36             | nA                                    |                                  |
| Cress                                | -         | -                 | -        | -              | 0.8              | nA                                    |                                  |
| <b>Mixed salad, organic</b>          | <b>+</b>  | <b>+</b>          | <b>+</b> | <b>+</b>       | <b>172222.22</b> | <b>nA</b>                             | <b><i>L.grayi</i></b>            |
| Onion sprouts                        | -         | -                 | -        | -              | 2.00             | nA                                    |                                  |
| Rocket sprouts                       | -         | -                 | -        | -              | 2.09             | nA                                    |                                  |
| Sprouts                              | -         | -                 | -        | -              | 1.65             | nA                                    |                                  |
| <b>Salmon</b>                        | <b>+</b>  | <b>+</b>          | <b>+</b> | <b>+</b>       | <b>55.71</b>     | <b>nA</b>                             | <b><i>L.welshimeri</i></b>       |
| Thai coriander                       | -         | -                 | -        | -              | 3.41             | nA                                    |                                  |
| Greek salad                          | -         | -                 | -        | -              | 3.43             | nA                                    |                                  |
| Mungbean sprouts, organic            | -         | -                 | -        | -              | 3.41             | nA                                    |                                  |
| Salad, organic                       | -         | -                 | -        | -              | 3.67             | nA                                    |                                  |
| Coriander                            | -         | -                 | -        | -              | 3.39             | nA                                    |                                  |
| Mixed salad                          | -         | -                 | +/-      | -              | 1.50             | 16S sequence<br>( <i>C. citreum</i> ) |                                  |
| <b>Salad</b>                         | <b>+</b>  | <b>+</b>          | <b>+</b> | <b>+</b>       | <b>8150.00</b>   | <b>nA</b>                             | <b><i>L.welshimeri</i></b>       |
| Microgreens                          | -         | -                 | -        | -              | 3.89             | nA                                    |                                  |
| Mungbean sprouts                     | -         | -                 | -        | -              | 4.95             | nA                                    |                                  |
| Mixed sprouts                        | -         | -                 | -        | -              | 1.70             | nA                                    |                                  |
| Sweet basil                          | -         | -                 | -        | -              | 1.77             | nA                                    |                                  |
| Mixed salad                          | -         | -                 | +/-      | -              | 1.49             | Spore-forming                         |                                  |
| Mixed sprouts                        | -         | -                 | -        | -              | 1.90             | nA                                    |                                  |
| Cheese and ham salad                 | -         | -                 | -        | -              | 3.32             | nA                                    |                                  |
| Thai coriander                       | -         | -                 | -        | -              | 2.00             | nA                                    |                                  |
| Parsley                              | -         | -                 | -        | -              | 4.90             | nA                                    |                                  |
| Salad                                | -         | -                 | -        | -              | 3.75             | nA                                    |                                  |
| Thai celery                          | -         | -                 | -        | -              | 2.33             | nA                                    |                                  |
| Basil                                | -         | -                 | -        | -              | 2.19             | nA                                    |                                  |
| Rice sandwich with smoked salmon     | -         | -                 | -        | -              | 1.67             | nA                                    |                                  |
| Filled pimiento                      | -         | -                 | -        | -              | 2.30             | nA                                    |                                  |
| Coriander                            | -         | -                 | -        | -              | 2.79             | nA                                    |                                  |
| Thai basil                           | -         | -                 | -        | -              | 2.43             | nA                                    |                                  |
| <b>Salad, organic</b>                | <b>+</b>  | <b>+</b>          | <b>+</b> | <b>+</b>       | <b>19500.00</b>  | <b>nA</b>                             | <b><i>L.innocua</i></b>          |
| Fleur-de-lis sprouts                 | -         | -                 | -        | -              | 1.51             | nA                                    |                                  |
| Smoked salmon                        | -         | -                 | -        | -              | 2.22             | nA                                    |                                  |
| Cicorino rosso                       | -         | -                 | -        | -              | 1.30             | nA                                    |                                  |
| Chicken salad                        | -         | -                 | -        | -              | 1.93             | nA                                    |                                  |
| Vietnamese coriander                 | -         | -                 | -        | -              | 2.17             | nA                                    |                                  |
| Mixed sprouts (alfa-alfa and rocket) | -         | -                 | +/-      | -              | 1.98             | Spore-forming                         |                                  |
| Crayfish salad                       | -         | -                 | -        | -              | 1.52             | nA                                    |                                  |
| Mixed sprouts                        | -         | -                 | -        | -              | 2.08             | nA                                    |                                  |
| Salad                                | -         | -                 | +/-      | -              | 1.02             | Spore-forming                         |                                  |
| Smoked salmon with herbs             | -         | -                 | -        | -              | 1.84             | nA                                    |                                  |
| Egg and chicken salad                | -         | -                 | -        | -              | 1.49             | nA                                    |                                  |



43 **Supplementary Table S3. Synthetic, codon-optimized luciferase DNA strings.**

Supplementary Table S3: Synthetic, codon-optimized luciferase DNA strings.

| String | Sequence [5'-3']                                                                                                                                                                                                                                                                                                                                                                                                                                                                                                                                                                                                                                                                                                                                                                                                                                                                                                                                                                                                                                                                                                                                                                                                                                                         | Size [bp] |
|--------|--------------------------------------------------------------------------------------------------------------------------------------------------------------------------------------------------------------------------------------------------------------------------------------------------------------------------------------------------------------------------------------------------------------------------------------------------------------------------------------------------------------------------------------------------------------------------------------------------------------------------------------------------------------------------------------------------------------------------------------------------------------------------------------------------------------------------------------------------------------------------------------------------------------------------------------------------------------------------------------------------------------------------------------------------------------------------------------------------------------------------------------------------------------------------------------------------------------------------------------------------------------------------|-----------|
| rluc   | <p>ATCACTA<b>GAGGAGGTA</b>AAATATAT<b>ATG</b> GGTGGTCGTCGTGTTTCGTTGGGAAGTTTAC<br/> ATCTCTCGTGCTTTATGGTTAACTCGTGAACCAACTGCTTACTGGTTAATCGAAATCA<br/> ACACTACTCATTACCGTGGTTCGCTACTATGGCTTCTAAAGTTTACGATCCAGAACA<br/> ACGTAAACGATGATCACTGGTCCACAATGGTGGGCTCGTTGTAACAAATGAACGT<br/> TTTAGATTCTTCATCACTACTACGATTCTGAAAAACATGCTGAAAACGCTGTTATCT<br/> TCTTACATGGTAACGCTACTTCTTCTTACTTATGGCGTCATGTTGTTCCACATATCGA<br/> ACCAGTTGCTCGTTGTATCATCCCAGATTTAATCGGTATGGGTAAATCTGGTAAATCT<br/> GGTAACGGTTCCTACCGTTTATTAGATCATTACAAATACTTAACTGCTTGGTTCGAAT<br/> TATTAACCTTACCAAAAAAATCATCTTCGTTGGTCATGATTGGGGTTCTGCTTTAGC<br/> TTTCCATTACGCTTACGAACATCAAGATCGTATCAAAGCTATCGTTCATATGGAATCT 1085<br/> GTTGTTGATGTTATCGAATCTTGGATGGGTTGGCCAGATATCGAAGAAGAATTAGCT<br/> TTAATCAAATCTGAAGAAGGTGAAAAAATGGTTTTAGAAAACAACCTTCTCGTTGAAAC<br/> TTTATTACCATCTAAAAATCATGCGTAAATTAGAACCAAGAAGATTTCGCTGCTTACTAG<br/> AACCATTCAAAGAAAAAGGTGAAGTTCGTCGTCCAACTTTATCTTGGCCACGTGAAAT<br/> CCCATTAGTTAAAGGTGGTAAACCAGATGTTGTTCAAATCGTTCGTAACATAACCGCT<br/> TACTTACGTGCTTCTGATGATTTACCAAAATTATTCATCGAATCTGATCCAGGTTTCTT<br/> CTCTAACGCTATCGTTGAAGGTGCTAAAAAATCCCAAACACTGAATTCGTTAAAGTT<br/> AAAGGTTTACATTTCTTACAAGAAGATGCTCCAGATGAAATGGGTAAATACATCAAATC<br/> TTTCGTTGAACGTGTTTTAAAAACGAACAA <b>TAA</b> ATCATA</p> |           |
| gluc   | <p>ATCACTA<b>GAGGAGGTA</b>AAATATAT<b>ATG</b> GGTGTTAAAGTTTTATTCGCTTTAATCTGTAT<br/> CGCTGTTGCTGAAGCTAAACCAACTGAAAACAACGAAGATTTCAACATCGTTGCTGTT<br/> GCTTCTAACTTCGCTACTACTGATTTAGATGCTGATCGTGGTAAATTACCAGGTAAAA<br/> AATTACCATTAGAAGTTTTAAAAGAAATGGAAGCTAACGCTCGTAAAGCTGGTTGTAC<br/> TCGTGGCTGTTAATCTGTTTATCTCATATCAAATGTACTCCAAAAATGAAAAAATTCA<br/> TCCCAGGTCGTTGTACTACTTACGAAGGTGATAAAGAATCTGCTCAAGGTGGTATCG 587<br/> GTGAAGCTATCGTTGATATCCCAGAAATCCCAGGTTTCAAAGATTTAGAACCAATGGA<br/> ACAATTCATCGCTCAAGTTGATTTATGTGTTGATTGTACTACTGGTTGTTAAAAGGT<br/> TTAGCTAACGTTCAATGTTCTGATTTATTAATAAATGTTACCACAACGTTGCGCTAC<br/> ATTCGCTTCTAAAATACAAGGTCAAGTTGATAAAATCAAAGGTGCTGGTGGTGAT <b>TAA</b><br/> ATCATA</p>                                                                                                                                                                                                                                                                                                                                                                                                                                                                                                                                                                   |           |
| nluc   | <p>ATCACTA<b>GAGGAGGTA</b>AAATATAT<b>ATG</b> GTTTTCACTTTAGAAGATTCGTTGGTGATTG<br/> GCGTCAAACCTGCTGGTTACAACCTTAGATCAAGTTTTAGAACAAAGGTGGTGGTTCTTCT<br/> TTATTCCAAAACCTTAGGTGTTTCTGTTACTCCAATCCAACGTATCGTTTTATCTGGTG<br/> AAAACGGTTTAAAAATCGATATCCATGTTATCATCCCATACGAAGGTTTATCTGGTGA<br/> TCAAATGGGTCAAATCGAAAAAATCTTCAAAGTTGTTACCCAGTTGATGATCATCATT 545<br/> TCAAAGTTATCTTACATTACGGTACTTTAGTTATCGATGGTGTACTCCAAACATGATC<br/> GATTACTTCGGTCGTCATACGAAGGTATCGCTGTTTTCGATGGTAAAAAATCACT<br/> GTTACTGGTACTTTATGGAACGGTAACAAAATCATCGATGAACGTTTAAATCAACCCAG<br/> ATGGTTCTTTATTATCCGTGTTACTATCAACGGTGTACTGGTTGGCGTTTATGTGA<br/> ACGTATCTTAGCT <b>TAA</b> ATCATA</p>                                                                                                                                                                                                                                                                                                                                                                                                                                                                                                                                                                                                                |           |

Bold = RBS; italics = coding sequence; red = start and stop codon.

44

45

46

47 **Supplementary Table S4.** Experimental set-up for measurement of reporter phage-induced  
 48 bioluminescence.

Supplementary Table S4: Experimental set-up for measurement of reporter phage-induced bioluminescence.

| Phage                     | Substrate                    | <i>L. monocytogenes</i><br>host strain | Infection<br>time<br>[min] | Culture<br>Temp.<br>[°C] | Substrate<br>volume<br>[μL] | Culture<br>volume<br>[μL] |
|---------------------------|------------------------------|----------------------------------------|----------------------------|--------------------------|-----------------------------|---------------------------|
| ΦA500:: <i>luxAB</i> ΔLCR | Nonanal <sup>1)</sup>        | WSLC 1042                              | 180                        | 30/20                    | 5                           | 95                        |
| ΦA500:: <i>rluc</i> ΔLCR  | Coelenterazine <sup>2)</sup> | WSLC 1042                              | 140                        | 30                       | 50                          | 50                        |
| ΦA500:: <i>gluc</i> ΔLCR  | Coelenterazine <sup>2)</sup> | WSLC 1042                              | 140                        | 30                       | 50                          | 50                        |
| ΦA500:: <i>nluc</i> ΔLCR  | Furimazine <sup>3)</sup>     | WSLC 1042                              | 180                        | 30                       | 50                          | 50                        |
| ΦA500 ΔLCR                | Coelenterazine <sup>2)</sup> | WSLC 1042                              | 140                        | 30                       | 50                          | 50                        |
|                           | Furimazine <sup>3)</sup>     |                                        | 180                        | 30                       | 50                          | 50                        |
|                           | Nonanal <sup>1)</sup>        |                                        | 180                        | 20                       | 5                           | 95                        |
| ΦA511:: <i>luxAB</i>      | Nonanal <sup>1)</sup>        | EGDe                                   | 180                        | 20                       | 5                           | 95                        |
| ΦA511:: <i>nluc</i> CPS   | Furimazine <sup>3)</sup>     | EGDe                                   | 180                        | 30                       | 50                          | 50                        |
| ΦA511:: <i>nluc</i> PLY   | Furimazine <sup>3)</sup>     | EGDe                                   | 180                        | 30                       | 50                          | 50                        |
| ΦA511                     | Furimazine <sup>3)</sup>     | EGDe                                   | 180                        | 30                       | 50                          | 50                        |
|                           | Nonanal <sup>1)</sup>        |                                        |                            | 20                       | 5                           | 95                        |
| ΦA006:: <i>nluc</i> ΔLCR  | Furimazine <sup>2)</sup>     | EGDe                                   | 180                        | 30                       | 50                          | 50                        |
| ΦA006 ΔLCR                | Furimazine <sup>2)</sup>     | EGDe                                   | 180                        | 30                       | 50                          | 50                        |

<sup>1)</sup> 0.35% nonanal in 70% EtOH

<sup>2)</sup> Renilla Luciferase Assay System (Promega)

<sup>3)</sup> Nano-Glo® Luciferase Assay System (Promega)

49

50
